# Supplementary material
Source: HighWire-hosted journal article supplement (https://rmdopen.bmj.com/content/6/2/e001257)
Supplement: inline-supplementary-material-3 [file inline-supplementary-material-3.pdf]

**Supplement table 3: Demographic and clinical information.**

| Variable                                                         | White Caucasian (n=149) | Asian (n=41) | Black (n=29)  | Other (n=12)  | Not specified (n=12) |
|------------------------------------------------------------------|-------------------------|--------------|---------------|---------------|----------------------|
| Female (%)                                                       | 140 (95)                | 36 (88)      | 26 (90)       | 9 (75)        | 11 (92)              |
| Age, years (range)                                               | 40 [31-51]              | 40 [30-51]   | 40 [29-50.5]  | 40 [29-50.25] | 40 [30-50]           |
| Male (%)                                                         | 9 (5)                   | 5 (12)       | 3 (10)        | 3 (25)        | 1(8)                 |
| Age, years (range)                                               | 41[31-51]               | 41 [31-50]   | 42 [33.25-50] | 41 [30-51]    | 44                   |
| Disease duration, years (range)                                  | 10 [6-17]               | 10[6-17]     | 10 [6-16]     | 10 [5-16]     | 10 [6-16]            |
| SLEDAI-2K score (range)                                          | 8[4-13]                 | 8[4-14]      | 8[4-12]       | 8[4-12]       | 8 [4-12]             |
| Global BILAG-BR score (range)                                    | 18.5 [12.5-24]          | 18[12-24]    | 18[12-24]     | 17[12-24]     | 18 [12.75-24]        |
| SLICC damage score (range)                                       | 0 [0-1]                 | 0 [0-1]      | 0 [0-1]       | 0 [0-1]       | 0 [0-1]              |
| Anti-ds-DNA positivity (%)                                       | 60 (40)                 | 25 (61)      | 15 (51)       | 6 (50)        | 3 (25)               |
| Low C3 and/or C4 (%)                                             | 67 (45)                 | 23 (56)      | 14 (48)       | 7 (58)        | 5 (42)               |
| Antimalarial drug treatment (%)                                  | 136 (91)                | 37 (90)      | 27 (93)       | 10 (83)       | 10 (83)              |
| Oral corticosteroid dose, mg (range)                             | 10 [10-20]              | 10 [9.5-20]  | 10 [10-20]    | 10 [9-20]     | 10 [10-20]           |
| Treatment with immunosuppressants /immunomodulators <sup>2</sup> | 59 (40)                 | 23 (56)      | 11 (38)       | 5 (42)        | 4 (33)               |
| Treatment with ACE or ARB2 inhibitors (%)                        | 10 (6.7)                | 4(9.7)       | 2 (6.9)       | 0 (0)         | 0 (0)                |

The SLE patient cohort was grouped by ethnicity. Data are presented as total and fractions (%) for categorical variables. Median values with interquartile ranges [25-75 IQR] are presented for continuous variables. Continuous variables were analysed using Mann Whitney U tests; categorical variables were tested using Pearson's Chi-square tests. While women and White Caucasian origin were (expectedly) overrepresented, no significant differences in the variables investigated were identified between races or genders.

<sup>1</sup> Ethnicity groups include White: White British, white Irish and "white other"; Asian: Bangladeshi, Chinese, Indian, Pakistani and "other Asian"; and Black: Black African, Caribbean and "other Black".

<sup>2</sup> Immunosuppressants include Azathioprine, Cyclophosphamide, Tacrolimus, Methotrexate, Mycophenolate Mofetil and Cyclosporin.

ACE- Angiotensin-converting enzyme and ARB2 - Angiotensin II receptor blockers
