# Supplementary material
Source: HighWire-hosted journal article supplement (https://rmdopen.bmj.com/content/6/2/e001257)
Supplement: inline-supplementary-material-9 [file inline-supplementary-material-9.pdf]

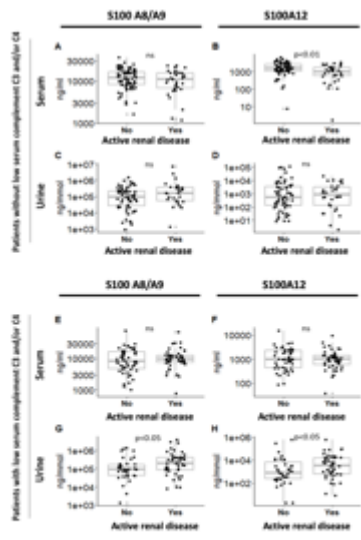

Supplement Figure 4
